# Supplementary material for: Advanced removal of toluene in aerosol by adsorption and photocatalytic degradation of silver-doped TiO2/PU under visible light irradiation
Source: Royal Society of Chemistry journal article supplement (doi:10.1039/c5ra23786f), 2016-01-01
Supplement: c5ra23786f1.pdf [file c5ra23786f1.pdf]

## Supplementary Material

### Advanced removal of toluene in aerosol by adsorption and photocatalytic degradation of silver doped TiO<sub>2</sub>/PU under visible light irradiation

Thanh-Dong Pham <sup>a</sup>, Byeong-Kyu Lee <sup>a</sup>, De Pham-Cong <sup>b</sup>

#### 1. FTIR results

Figure S1 shows the presence of the urethane group (-NH-CO-O-), containing N-H, C-N, C=O, and C-O bonds, in the FTIR spectrum of the pristine PU [1, 2]. Compared to the spectrum of the pristine PU, the FTIR spectrum of the pre-treated PU showed a decrease in the intensities of the peaks corresponding to the urethane groups (N-H, C-N, C=O and C-O), with new occurrence of peaks corresponding to the isocyanate group (-N=C=O) [3]. This indicates that isocyanate group was successfully introduced into the pristine PU. The FTIR spectrum of the TiO<sub>2</sub>/PU showed that the isocyanate group in the pre-treated PU continuously reacted with the amine group in the amino titanosiloxane to form a urethane group, which caused immobilization of titanosiloxane on the surface of the PU. The immobilization was confirmed by comparison between the FTIR spectra of the pre-treated PU, TiO<sub>2</sub>/PU and 6 % Ag-TiO<sub>2</sub>/PU, the latter two of which showed strong increases in the N-H and C=O peaks, corresponding to the peaks of the urea group (-NH-CO-NH-), along with significant decreases in the isocyanate peaks [4]. In addition, the FTIR spectra of the TiO<sub>2</sub>/PU and 6 % Ag-TiO<sub>2</sub>/PU showed peaks at 1,240 cm<sup>-1</sup> and 970 cm<sup>-1</sup>, which are typical of C-Si and Si-O-Ti bonds, respectively [5, 6]. The occurrences of these peaks indicate that the reaction between titanium tetraisopropoxide with  $\gamma$ -aminopropyl triethoxysilane to form amino titanosiloxane was successful. The FTIR spectra of the TiO<sub>2</sub>/PU and 6 % Ag-TiO<sub>2</sub>/PU also exhibited peaks of TiO<sub>2</sub> (Ti-O-Ti), which was formed from hydrolysis of the alkyl groups in amino titanosiloxane [7]. Thus, TiO<sub>2</sub> was deposited successfully on the

25 surface of PU in both  $\text{TiO}_2/\text{PU}$  and  $\text{Ag-TiO}_2/\text{PU}$  based on bridge role of silicone, which bonds  
26  $\text{TiO}_2$  and PU by a C-Si-O-Ti link.

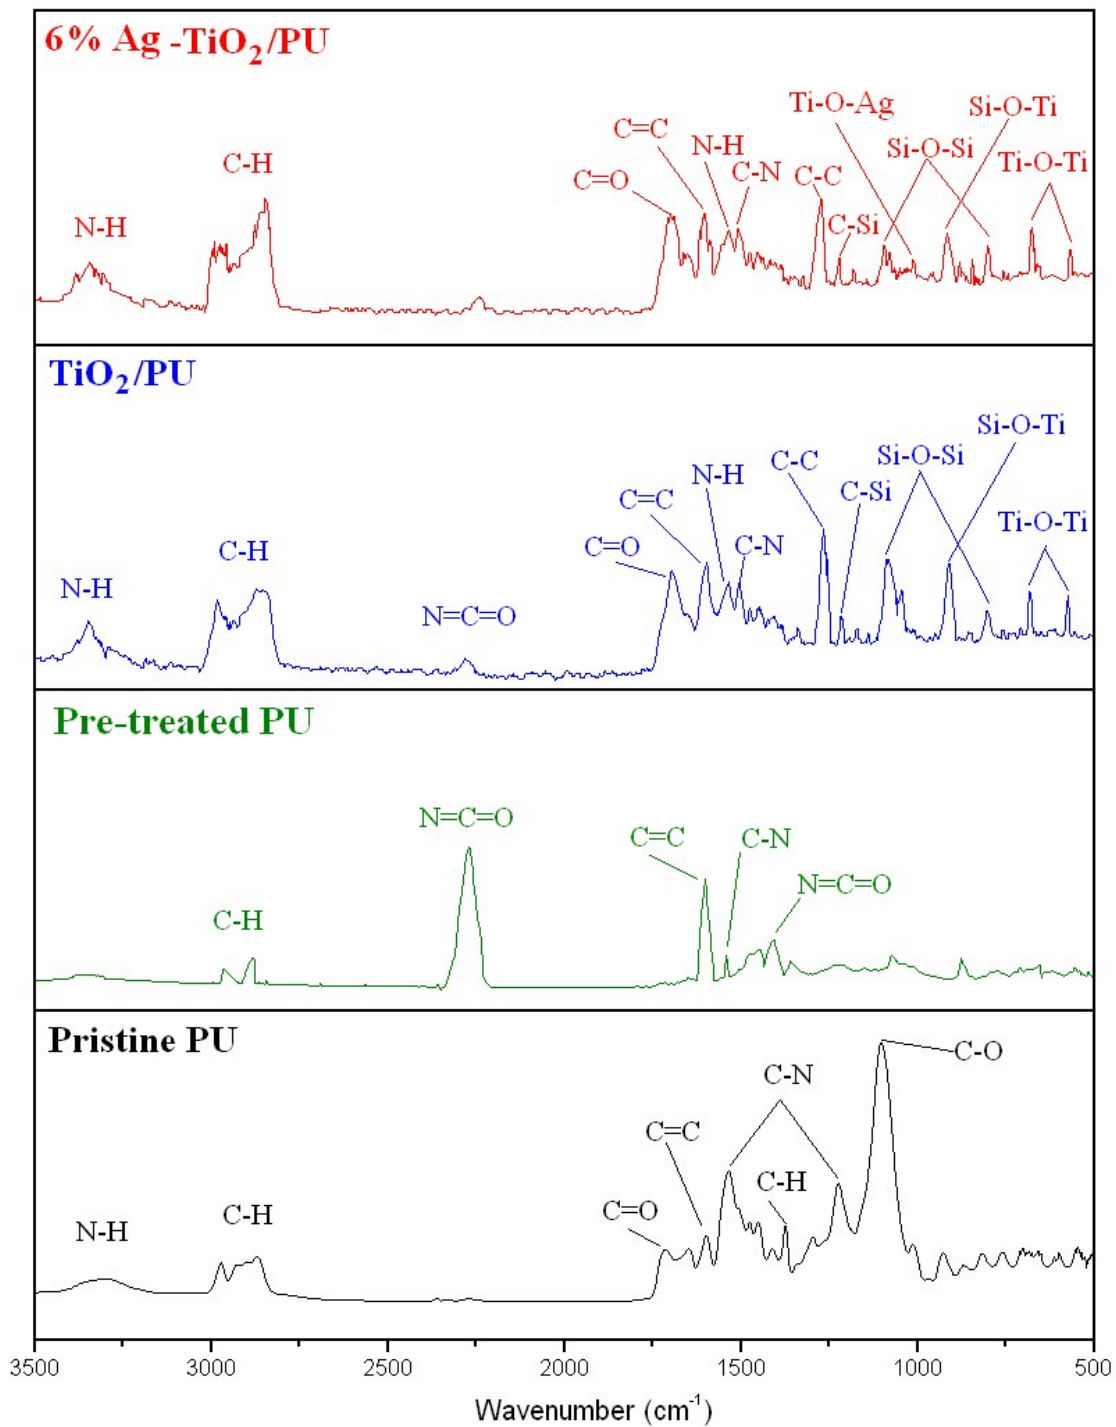

27

28 Figure S1: FTIR spectra of pristine PU, pre-treated PU,  $\text{TiO}_2/\text{PU}$  and 6 %  $\text{Ag-TiO}_2/\text{PU}$

## 29 Reference

- 30 [1] G. Trovati, E.A. Sanches, S.C. Neto, Y.P. Mascarenhas, G.O. Chierice, Characterization of  
31 polyurethane resins by FTIR, TGA, and XRD, *Journal of Applied Polymer Science*, 115  
32 (2010) 263-268.
- 33 [2] R.M. Hodlur, M.K. Rabina, Self assembled graphene layers on polyurethane foam as a highly  
34 pressure sensitive conducting composite, *Composites Science and Technology*, 90 (2014)  
35 160-165.
- 36 [3] U. Sebenik, M. Krajnc, Influence of the soft segment length and content on the synthesis and  
37 properties of isocyanate-terminated urethane prepolymers, *International Journal of Adhesion  
38 & Adhesives*, 27 (2007) 527-535.
- 39 [4] P.A. Charpentier, K. Burgess, L. Wang, R.R. Chowdhury, A.F. Lotus, G. Moula, Nano-  
40 TiO<sub>2</sub>/polyurethane composites for antibacterial and self-cleaning coatings, *Nanotechnology*,  
41 23 (2012) 425606-425615.
- 42 [5] J. Wang, C.H. Lua, J.R. Xiong, Self-cleaning and depollution of fiber reinforced cement  
43 materials modified by neutral TiO<sub>2</sub>/SiO<sub>2</sub> hydrosol photoactive coatings, *Applied Surface  
44 Science*, 298 (2014) 19-25.
- 45 [6] M.T. Kim, Deposition behavior of hexamethydisiloxane films based on the FTIR analysis of  
46 Si–O–Si and Si–CH<sub>3</sub> bonds, *Thin Solid Films*, 311 (1997) 157-163.
- 47 [7] Y. Wen, H. Ding, Y. Shan, Preparation and visible light photocatalytic activity of  
48 Ag/TiO<sub>2</sub>/graphene nanocomposite, *Nanoscale*, 3 (2011) 4411-4418.
- 49  
50
